# Supplementary material for: Two luminescent cuprous iodides with hitherto-unknown free imidazolate sites for efficiently sensing Fe3+ and Cr2O72−
Source: Royal Society of Chemistry journal article supplement (doi:10.1039/d2tc00270a), 2022-01-01
Supplement: d2tc00270a1.pdf [file d2tc00270a1.pdf]

## Supporting information

### Two luminescent cuprous iodides with hitherto-unknown free imidazolate sites for efficiently sensing Fe<sup>3+</sup> and Cr<sub>2</sub>O<sub>7</sub><sup>2-</sup>

Qian Peng,<sup>†</sup> Xing Liu,<sup>†</sup> and Jian Zhou<sup>\*,†</sup>

<sup>†</sup>Chongqing Key Laboratory of Inorganic Functional Materials, College of Chemistry, Chongqing Normal University, Chongqing 401331, P. R. China

#### General Remarks

All analytical grade chemicals were obtained commercially and used without further purification. Elemental analyses (C and H) were performed using a PE2400 II elemental analyzer. PXRD patterns were obtained using a Bruker D8 Advance XRD diffractometer with Cu K $\alpha$  radiation ( $\lambda = 1.54056 \text{ \AA}$ ). IR spectra were obtained from a powdered sample pelletized with KBr on an ABB Bomen MB 102 series IR spectrophotometer in the range of 400–4000cm<sup>-1</sup>. The solid-state UV/Vis spectra were measured at room temperature using an Agilent Cary 5000 UV/Vis spectrophotometer. Photoluminescent spectrum and lifetime were performed on an Edinburgh FLS 980 analytical instrument equipped with 450 W xenon lamp and UF900H high-energy microsecond flash-lamp as the excitation source. The quantum yield (QY) is measured by the Edinburgh FLS1000 fluorescence, which is equipped with a 450W Xe lamp and a monochromator for wavelength discrimination, an integrating sphere for the sample chamber, and an R928P analyzer for signal detection. The XPS spectra were collected on an AEI (Kratos) ES 200 B X-ray photoelectron spectrometer with a base pressure of about  $\sim 10^{-8}$  Torr.

#### Crystal Structure Determinations

The intensity data of **1** and **2** were collected on a Bruker diffractometer-SMART-APEX II using a  $\omega$ -scan method with graphite monochromated Mo K $\alpha$  radiation ( $\lambda = 0.71073 \text{ \AA}$ ). Data reduction and absorption corrections were performed using the SAINT and SADABS software packages,<sup>S1</sup> respectively. The structures were solved

by direct methods using SHELXS-97 and refined by full-matrix least-squares on F<sup>2</sup> using the SHELXL-97 program.<sup>S2</sup> The non-hydrogen atoms were refined anisotropically. H atoms were placed in idealized locations and refined as riding. Technical details of data collections and refinement are summarized in Table S1.

Table S1 Crystallographic data for **1** and **2**.

|                                         | <b>1</b>                                                                       | <b>2</b>                                                                          |
|-----------------------------------------|--------------------------------------------------------------------------------|-----------------------------------------------------------------------------------|
| Chemical formula                        | C <sub>20</sub> H <sub>16</sub> Cu <sub>4</sub> I <sub>4</sub> N <sub>12</sub> | C <sub>20</sub> H <sub>16</sub> Cu <sub>2</sub> I <sub>4</sub> N <sub>12</sub> Pb |
| Fw                                      | 1186.2                                                                         | 1266.35                                                                           |
| Crystal system                          | monoclinic                                                                     | monoclinic                                                                        |
| Space group                             | C2/c                                                                           | C2/c                                                                              |
| a (Å)                                   | 15.5655(11)                                                                    | 16.4277(8)                                                                        |
| b (Å)                                   | 11.3560(9)                                                                     | 10.8605(6)                                                                        |
| c (Å)                                   | 17.3817(11)                                                                    | 17.2943(8)                                                                        |
| β (deg)                                 | 92.384(2)                                                                      | 98.6794(19)                                                                       |
| V (Å <sup>3</sup> )                     | 3069.8(4)                                                                      | 3050.2(3)                                                                         |
| Z                                       | 8                                                                              | 4                                                                                 |
| T (K)                                   | 296(2)                                                                         | 296(2)                                                                            |
| ρ <sub>calc</sub> (g.cm <sup>-3</sup> ) | 2.567                                                                          | 2.758                                                                             |
| F(000)                                  | 2192                                                                           | 2288                                                                              |
| θ range (deg)                           | 3.191 ≤ θ ≤ 25.095                                                             | 3.141 ≤ θ ≤ 27.483                                                                |
| Reflections collected                   | 14079                                                                          | 10540                                                                             |
| Unique reflections                      | 2741                                                                           | 3446                                                                              |
| Reflections (I>2σ(I))                   | 2248                                                                           | 2764                                                                              |
| R1, wR2 [I>2σ(I)] <sup>[a]</sup>        | 0.0345, 0.0749                                                                 | 0.0530, 0.1154                                                                    |
| R1, wR2 (all data)                      | 0.0495, 0.0832                                                                 | 0.0722, 0.1230                                                                    |
| goodness-of-fit on F <sup>2</sup>       | 1.054                                                                          | 1.042                                                                             |

### Computational methods

The band structure and density of states (DOS) of **1** and **2** were theoretically calculated by using the computer code CASTEP.<sup>s3</sup> The total energy is calculated with the density functional theory (DFT) using the Perdew–Burke–Ernzerhof generalized gradient approximation (GGA).<sup>s4</sup> The following orbital electrons are treated as valence electrons: H 1s<sup>1</sup>, N 2s<sup>2</sup> 2p<sup>3</sup>, C 2s<sup>2</sup> 2p<sup>2</sup>, Cu 3d<sup>10</sup> 4s<sup>1</sup>, I 5s<sup>2</sup> 5p<sup>5</sup> and 5d<sup>10</sup> 6s<sup>2</sup> 6p<sup>2</sup>. The number of plane waves included in the basis is determined by a cutoff energy of 270 eV, and the numerical integration of the Brillouin zone is performed using a Monkhorst–Pack k point sampling: 2 × 2 × 1. The Fermi level (E<sub>F</sub> = 0 eV) was selected as the reference of the energy.

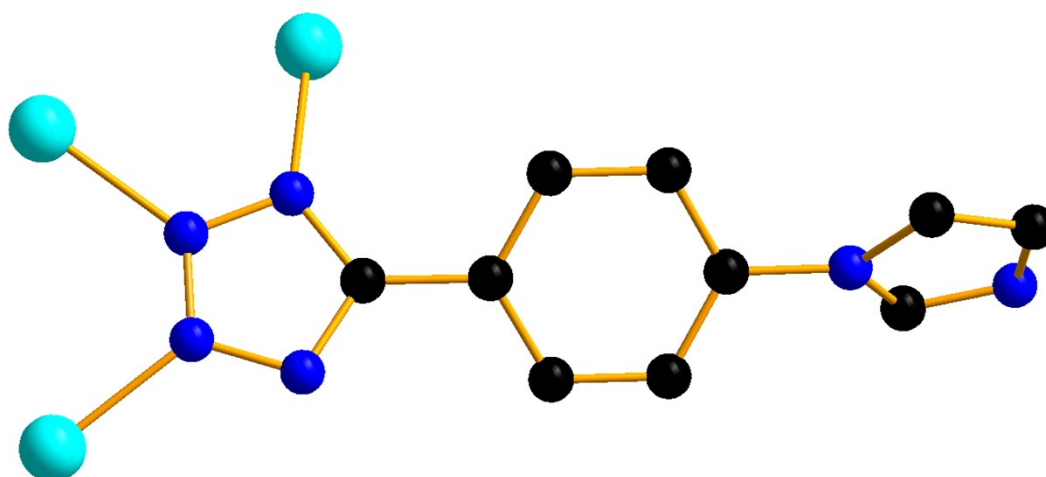

**Fig. S1** The coordination mode of HL ligand.

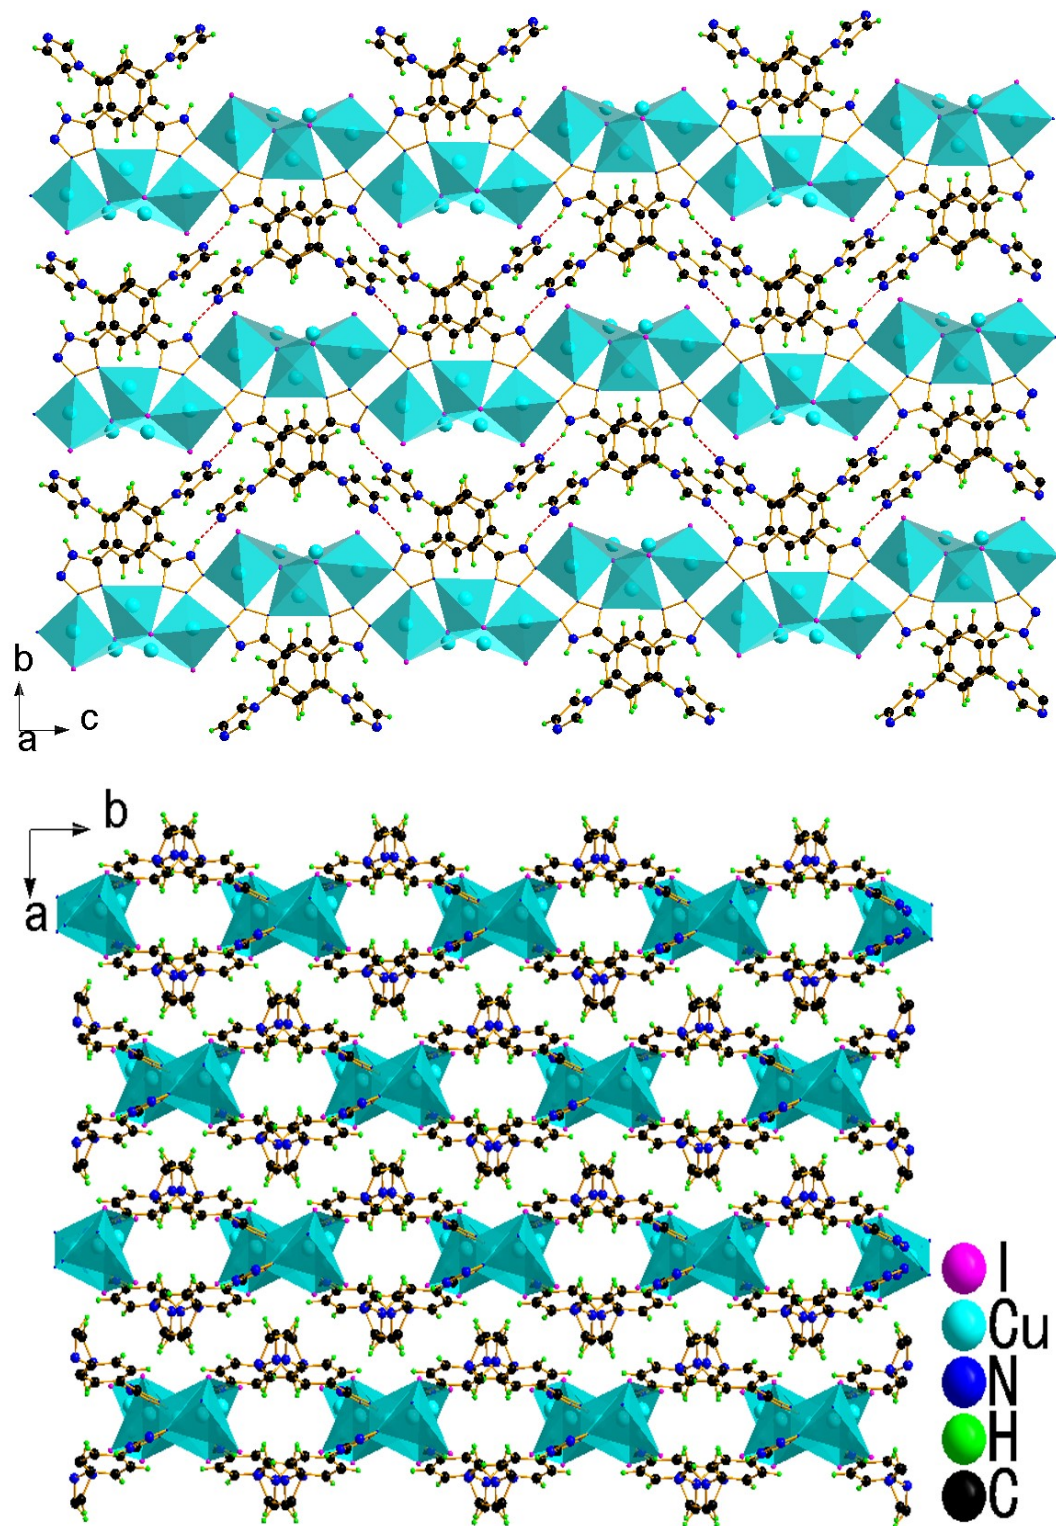

**Fig. S2** a) The layer constructed by the N–H···N H-bonds in **1**. b) the 3-D supramolecular structure.



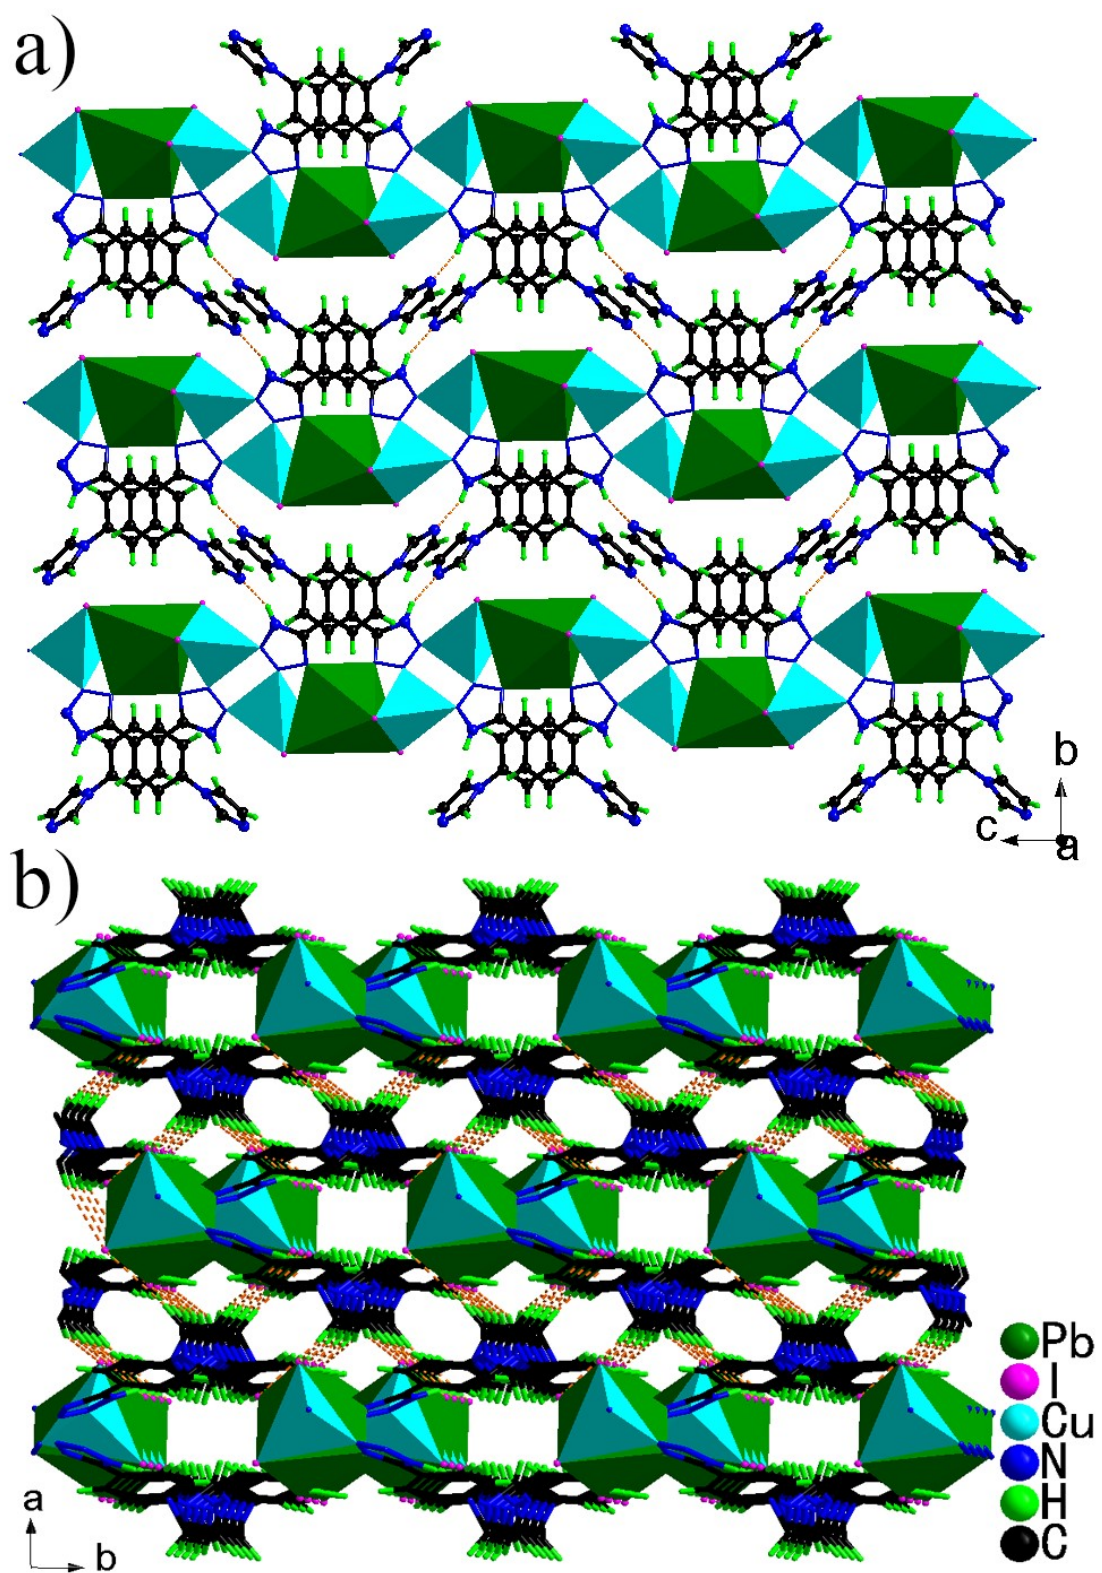

**Fig. S3** a) The layer constructed by the N–H···N H-bonds in 2. b) the 3-D network structure.

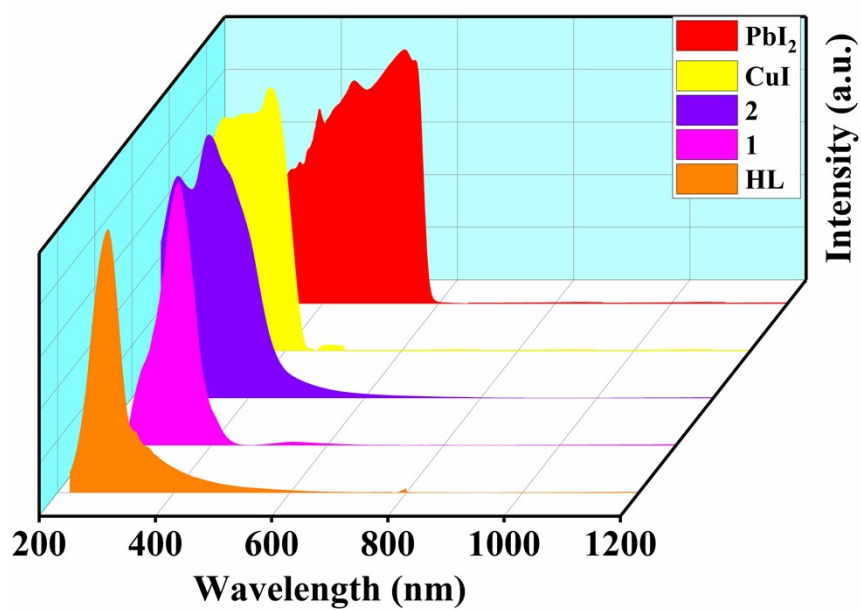

Fig. S4 The UV-vis spectra of 1, 2, HL, CuI and PbI<sub>2</sub> at room temperature.

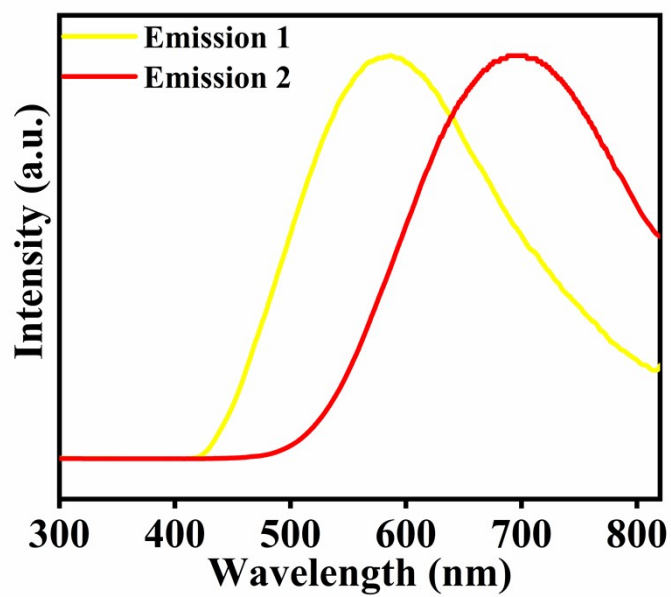

Fig. S5 Emission spectra of 1 and 2 at room temperature

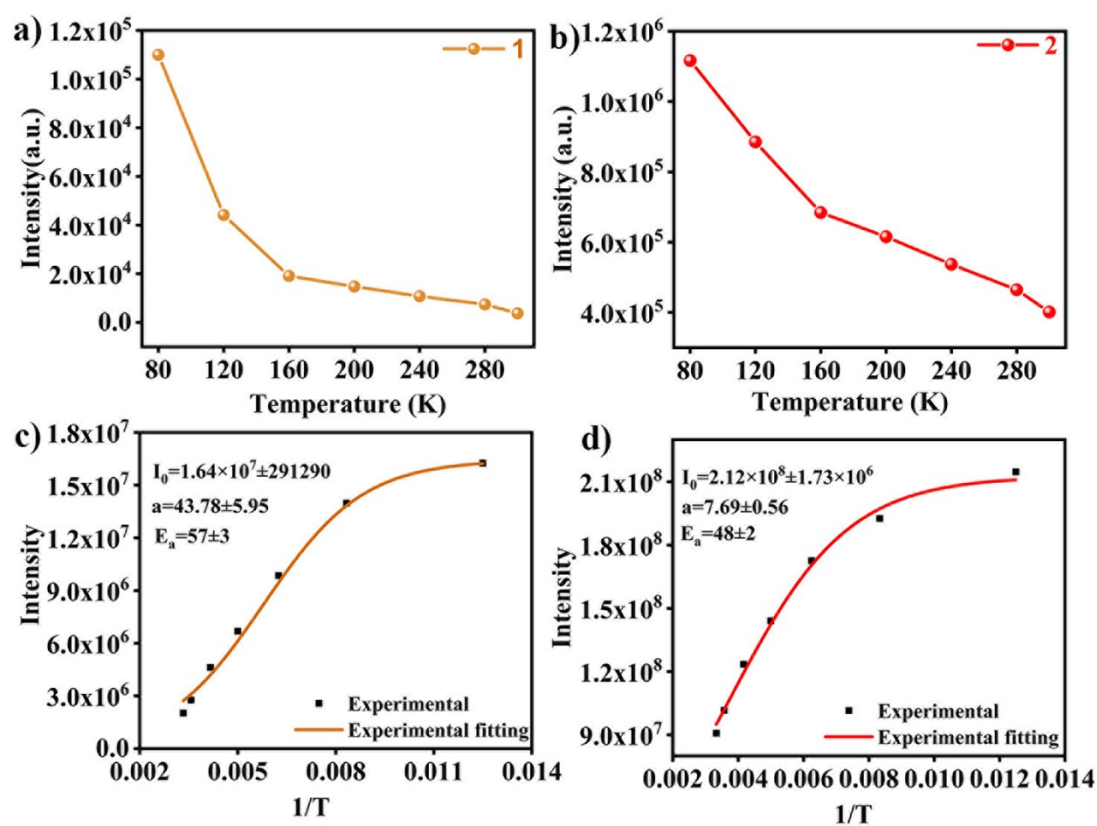

**Fig. S6** Temperature dependent luminescent intensity of 1 (a) and 2 (b). The theoretical fitting data from Arrhenius-type model for 1 (c) and 2 (d).

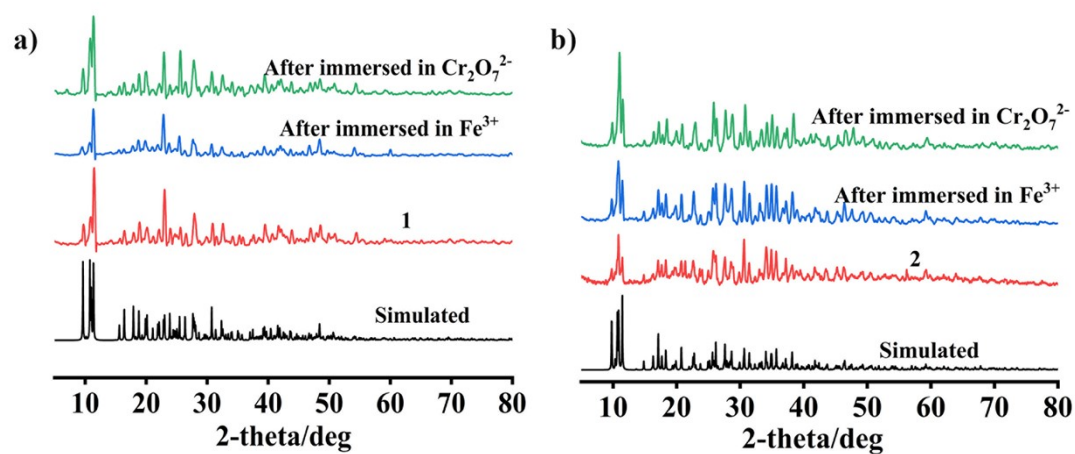

**Fig. S7** Simulated, experimental and after immersed XRD patterns of 1 (a) and 2 (b).

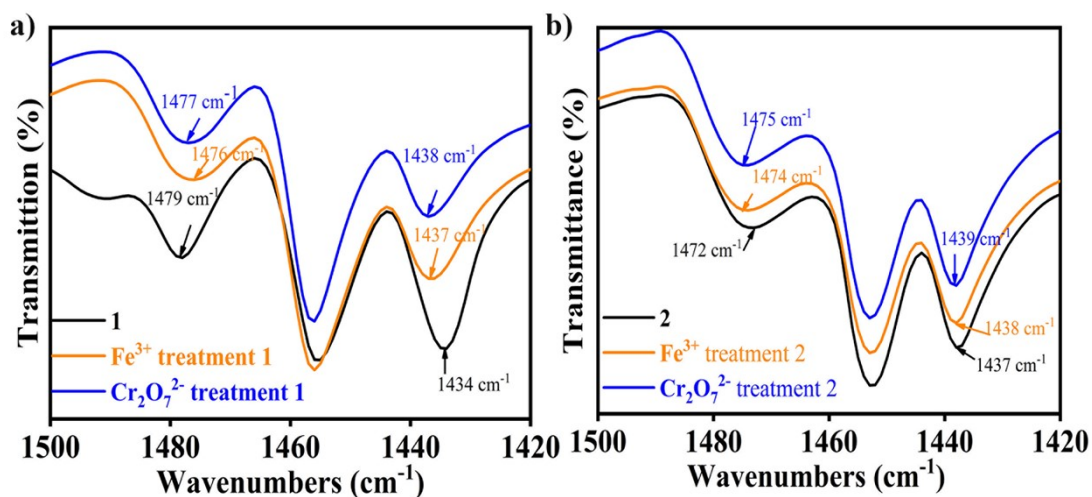

Fig. S8 IR of 1-2 and 1-2 treated with  $\text{Fe}^{3+}$   $\text{Cr}_2\text{O}_7^{2-}$ .

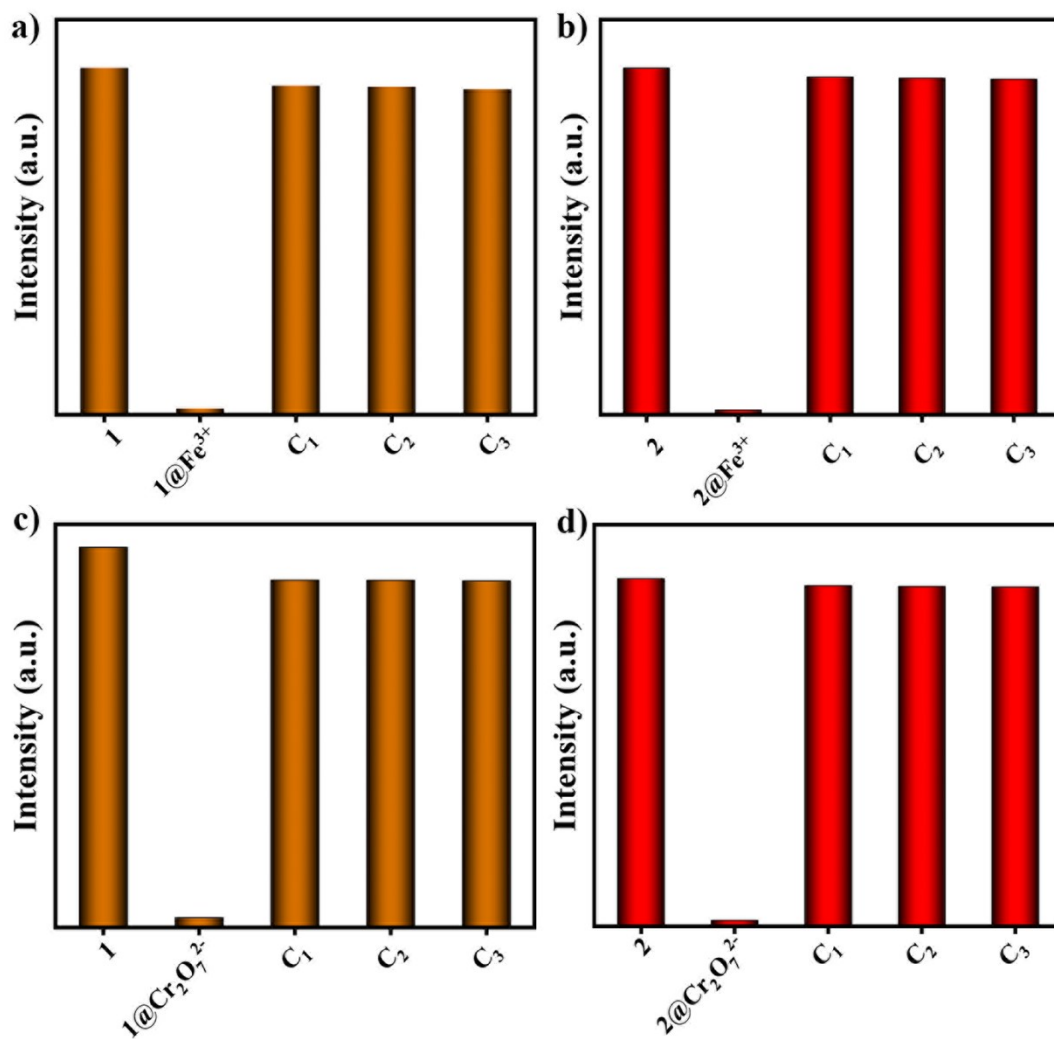

Fig. S9 Luminescent intensity of 1 and 2 after three recycles (C1, C2, C3) in  $\text{Fe}^{3+}$  (a), (b) and  $\text{Cr}_2\text{O}_7^{2-}$  (c), (d) solutions (0.01 mol/L).



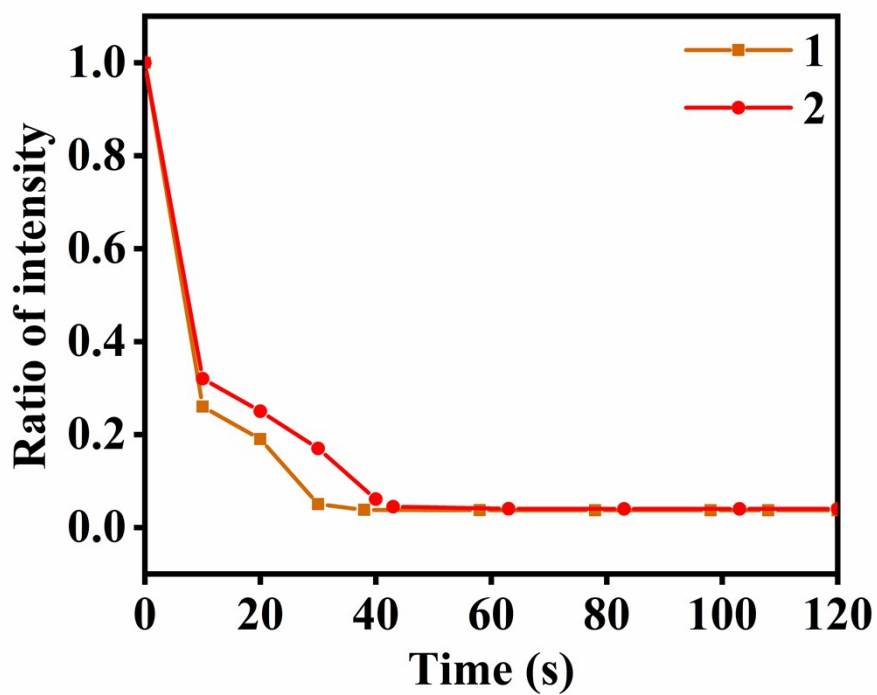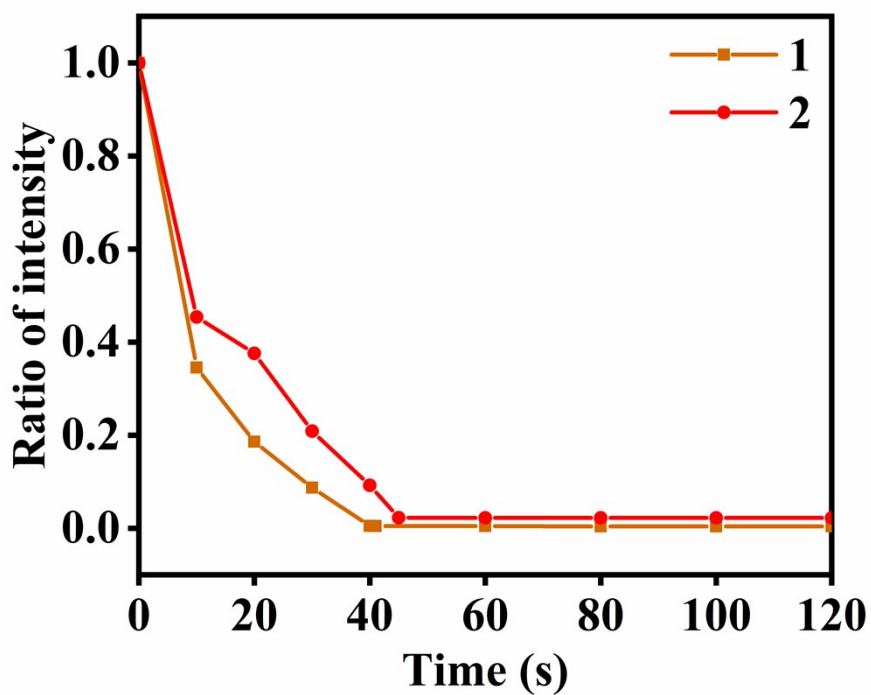

**Fig. S10** Luminescent intensity of 1 and 2 at different reaction times in  $\text{Fe}^{3+}$  and  $\text{Cr}_2\text{O}_7^{2-}$  solutions

## References

(s1) APEX3, SADABS, and SAINT, Bruker AXS Inc., Madison, WI, USA, **2008**.

(s2) Sheldrick, G.M. *Acta Crystallogr Sect. A Found. Crystallogr.* **2008**, *64*, 112.

(s3) (a) Segall, M. D.; Lindan, P. J. D.; Probert, M. J.; Pickard, C. J.; Hasnip, P. J.;

Clark, S. J.; Payne, M. C. *J. Phys.: Condens. Matter*, **2002**, *14*, 2717; (b) Milman,

V.; Winkler, B.; White, J. A.; Pickard, C. J.; Payne, M. C.; Akhmatkaya, E. V.;

Nobes, R. H. *Int. J. Quantum Chem.* **2000**, *77*, 895.

(s4) Perdew, J. P.; Burke, K.; Ernzerhof, M. *Phys. Rev. Lett.* **1996**, *77*, 3865.
